# Supplementary material for: Understanding Dementia: Knowledge and Risk Factor Awareness Among University Psychology Students
Source: Research Square preprint supplement (doi:10.21203/rs.3.rs-6523159/v1), 2025-05-30
Supplement: Supplementary file 1 [file dac8b5d038928a1f0f34e1f1.docx]

**Supplementary Text.**

**Survey items.**

Demographics

1. How old are you?
2. What is your gender?
   - Male
   - Female
3. What is the highest finalised degree of education of your mother?

- Primary Education
- Secondary Education (GCSE/O-Levels)
- Post-Secondary Education (College, A-Levels, NVQ3 or below, or similar)
- Vocational Qualification (Diploma, Certificate, BTEC, NVQ 4 and above, or similar)
- Undergraduate Degree (BA, BSc etc.)
- Post-graduate Degree (MA, MSc etc.)
- Doctorate (PhD)

1. What is the highest finalised degree of education of your father?

- Primary Education
- Secondary Education (GCSE/O-Levels)
- Post-Secondary Education (College, A-Levels, NVQ3 or below, or similar)
- Vocational Qualification (Diploma, Certificate, BTEC, NVQ 4 and above, or similar)
- Undergraduate Degree (BA, BSc etc.)
- Post-graduate Degree (MA, MSc etc.)
- Doctorate (PhD)

Dementia knowledge

1. Please describe your understanding of dementia _____
2. Dementia describes a set of symptoms including loss of memory, sudden mood swings, not remembering who people are, and having trouble finding your words. Alzheimer's disease is one form of dementia. How much would you say you know about dementia?
   - A great deal
   - Quite a lot
   - Some
   - Not very much
   - Nothing at all
   - I don't know
   - I prefer not to answer this question
3. Have you ever attended to a lecture on dementia?
   - Yes
   - No
4. Have you ever personally known anyone with dementia?
   - No, I don't know anyone who has, or had, dementia
   - Yes, my parents
   - Yes, my grandparents
   - Yes, other family member
   - Yes, a friend(s) I know fairly well
   - Yes, a friend(s) or acquaintance(s) I know less well
   - Yes, someone else
   - I am not sure
   - I prefer not to answer this question

*Indicate the extent to which you agree or disagree with the following statements.*

1. Dementia is a normal part of ageing

- Strongly disagree
- Disagree
- Somewhat disagree
- Somewhat agree
- Agree
- Strongly agree

1. Dementia is curable

- Strongly disagree
- Disagree
- Somewhat disagree
- Somewhat agree
- Agree
- Strongly agree

1. Dementia is preventable (able to be avoided)

- Strongly disagree
- Disagree
- Somewhat disagree
- Somewhat agree
- Agree
- Strongly agree

1. It is possible to reduce the risk of developing dementia

- Strongly disagree
- Disagree
- Somewhat disagree
- Somewhat agree
- Agree
- Strongly agree

1. It is possible to delay the onset of dementia

- Strongly disagree
- Disagree
- Somewhat disagree
- Somewhat agree
- Agree
- Strongly agree

1. People my age have a good understanding of dementia

- Strongly disagree
- Disagree
- Somewhat disagree
- Somewhat agree
- SAgree
- Strongly agree

1. What sources have influenced your knowledge of dementia?

- Primary school
- Secondary school
- Tertiary education
- Public health campaigns
- Friends or family members
- Online
- TV and radio
- Social media
- Books/magazines
- Health professionals
- Other

Dementia risk awareness

1. A risk factors is something that increases a person’s chance of developing a disease or conditions. There are two types of risk factors: non-modifiable and modifiable. People have no control over non-modifiable risk factors, and they generally relate to genetics and age. People have control over modifiable risk factors. For example, sun exposure is a modifiable risk factor for developing skin cancer and smoking is a modifiable risk factor for developing lung cancer. Do you think there are any modifiable risk factors for dementia?

- Yes
- No

1. Please list what you think are modifiable risk factors for dementia _____

There are non-modifiable risk factors for dementia including age that cannot be controlled. There are also modifiable risk factors that can reduce the chance of developing dementia in late-life.

Ple*ase state how much you agree or disagree with the following statements.*

1. 'High blood pressure increases your chances of getting dementia'
   - Agree strongly
   - Agree
   - Neither agree nor disagree
   - Disagree
   - Disagree strongly
2. 'Having a parent with dementia increases the chances of getting dementia'
   - Agree strongly
   - Agree
   - Neither agree nor disagree
   - Disagree
   - Disagree strongly
3. ‘The use of painkillers increases your chances of getting dementia’
   - Agree strongly
   - Agree
   - Neither agree nor disagree
   - Disagree
   - Disagree strongly
4. ‘Smoking increases your chances of getting dementia’
   - Agree strongly
   - Agree
   - Neither agree nor disagree
   - Disagree
   - Disagree strongly
5. ‘No or moderate alcohol use lowers your chances of getting dementia’
   - Agree strongly
   - Agree
   - Neither agree nor disagree
   - Disagree
   - Disagree strongly
6. Regular physical activity lowers your chances of getting dementia’
   - Agree strongly
   - Agree
   - Neither agree nor disagree
   - Disagree
   - Disagree strongly
7. ‘Working in a noisy environment increases your chances of getting dementia’
   - Agree strongly
   - Agree
   - Neither agree nor disagree
   - Disagree
   - Disagree strongly
8. ‘Depression increases the chances of getting dementia’
   - Agree strongly
   - Agree
   - Neither agree nor disagree
   - Disagree
   - Disagree strongly
9. ‘Diabetes increases the chances of getting dementia’
   - Agree strongly
   - Agree
   - Neither agree nor disagree
   - Disagree
   - Disagree strongly
10. ‘Being overweight increases the chances of getting dementia’
    - Agree strongly
    - Agree
    - Neither agree nor disagree
    - Disagree
    - Disagree strongly
11. ‘Poor personal hygiene increases the chances of getting dementia’
    - Agree strongly
    - Agree
    - Neither agree nor disagree
    - Disagree
    - Disagree strongly
12. ‘A mentally active lifestyle lowers the chances of getting dementia’
    - Agree strongly
    - Agree
    - Neither agree nor disagree
    - Disagree
    - Disagree strongly
13. ‘Heart disease increases the chances of getting dementia’
    - Agree strongly
    - Agree
    - Neither agree nor disagree
    - Disagree
    - Disagree strongly
14. ‘Kidney disease increases the chances of getting dementia’
    - Agree strongly
    - Agree
    - Neither agree nor disagree
    - Disagree
    - Disagree strongly
15. ‘Having children increases the chances of getting dementia’
    - Agree strongly
    - Agree
    - Neither agree nor disagree
    - Disagree
    - Disagree strongly
16. ‘High cholesterol increases the chances of getting dementia’
    - Agree strongly
    - Agree
    - Neither agree nor disagree
    - Disagree
    - Disagree strongly
17. ‘Healthy diet lowers the chances of getting dementia’
    - Agree strongly
    - Agree
    - Neither agree nor disagree
    - Disagree
    - Disagree strongly

End

Thank you very much for filling in this questionnaire. If you have any remarks or questions regarding this study, please contact us via [*email address*].
